# Supplementary material for: EP4 signalling is essential for controlling islet inflammation by causing a shift in macrophage polarization in obesity/type 2 diabetes
Source: PubMed Central journal article supplement — Diab Vasc Dis Res. 2020 Jul 28;17(4):1479164120945675. doi: 10.1177/1479164120945675 (PMC7510360; doi:10.1177/1479164120945675), 2020-07-28
Supplement: Supplemental_Materials_DVDRes-Mar-2020-00026.R1_20200705.pdf [file Supplemental_Materials_DVDRes-Mar-2020-00026.R1_20200705.pdf]

## Supplemental Materials

### Expanded Materials and Methods

#### *Intraperitoneal glucose tolerance test*

For the intraperitoneal glucose tolerance test, mice were fasted for 16 h and then injected with 15% D-glucose (Wako Pure Chemical Industries Ltd., Osaka, Japan). The concentration of plasma insulin was measured using the Ultra Sensitive Mouse/Rat Insulin ELISA kit (Morinaga Institute of Biological Science, Inc., Yokohama, Japan).

#### *Histology and immunostaining*

The pancreas was harvested and fixed overnight with 4% paraformaldehyde (Wako), embedded in paraffin, and sectioned. The sections were stained with anti-insulin (Abcam, Cambridge, UK), or anti-glucagon (Cell Signaling Technology, Danvers, MA, USA) antibodies, followed by incubation with Alexa Fluor 488-conjugated donkey anti-rat antibody or Alexa Fluor 594-conjugated donkey anti-rabbit antibody (Invitrogen, Carlsbad, CA, USA). ImageJ software version 1.6.0\_24 (NIH, Bethesda, MD, USA) was used to measure the sensitivity of the immunoreaction.

#### *Non-contact co-culture system*

MIN6 cells were cultured in the lower chamber of a 24-well Transwell plate insert with a

74- $\mu$ m mesh size polyester membrane. The MIN6 cells were washed and DMEM was replaced. Concurrently, peritoneal macrophages ( $2 \times 10^5$  cells/well) were cultured in the upper chamber, and then the two sets of cells were placed together by assembling both parts of the Transwell and incubated in DMEM at 37°C. After 14 h of incubation, the Transwell-attached macrophages were removed and incubated for 24 h, after which MIN6 cells were used for the assay.

#### *In vitro GSIS assay*

MIN6 cells or those cells incubated with ONO-AE1-329 were maintained in DMEM containing 5.5 mM glucose for 4 h, and then the medium was changed to DMEM containing 25 mM glucose. After 18 h of incubation, insulin release was measured using an enzyme-linked immunosorbent assay kit (Ultra Sensitive Mouse/Rat Insulin ELISA kit, Morinaga Institute of Biological Science).

#### *Cytometric bead assay*

TNF $\alpha$ , IL-6 and IL-10 in the supernatant of macrophages after *in vitro* M1/M2 polarization was quantitatively estimated using the BD Cytometric Bead Array (CBA) kit (BD Biosciences, Franklin Lakes, NJ, USA).

**Table S1**

The PCR primers used for amplification were as follows:

| <b>Species</b> | <b>Gene</b>    | <b>Primers</b>                                                   |
|----------------|----------------|------------------------------------------------------------------|
| mouse          | <i>β-actin</i> | 5'-CCTGAGCGCAAGTACTCTGTGT-3',<br>5'-GCTGATCCACATCTGCTGGAA-3'     |
|                | <i>Tnfa</i>    | 5'-CATCTTCTCAAATTTCGAGTGACAA-3'<br>5'-TGGGAGTAGACAAGGTACAACCC-3' |
|                | <i>Tlr4</i>    | 5'-ATGGCATGGCTTACACCACC-3',<br>5'-GAGGCCAATTTTGTCTCCACA-3'       |
|                | <i>Mcp-1</i>   | 5'-GCTGGAGCATCCACGTGTT-3',<br>5'-ATCTTGCTGGTGAATGTGTAGCA-3'      |
|                | <i>Cd11c</i>   | 5'-CTGGATAGCCTTTCTTCTGCTG-3',<br>5'-GCACACTGTGTCCGAACTC-3'       |
|                | <i>Cd68</i>    | 5'-CTTCCCACAGGCAGCACAG-3',<br>5'-AATGATGAGAGGCAGCAAGAGG-3'       |
|                | <i>Cd163</i>   | 5'-GGGTCATTCAGAGGCACACTG-3',<br>5'-CTGGCTGTCCTGTCAAGGCT-3'       |
|                | <i>Insulin</i> | 5'-GGAGCGTGGCTTCTTCTACA-3',<br>5'-GGTGGGCCTTAGTTGCAGTA-3'        |
|                | <i>Pdx1</i>    | 5'-ACTTGA GCGTTCCAATACGC-3',<br>5'-AGAGGGGGA ACGACTCTAGG-3'      |

**Figure S1**

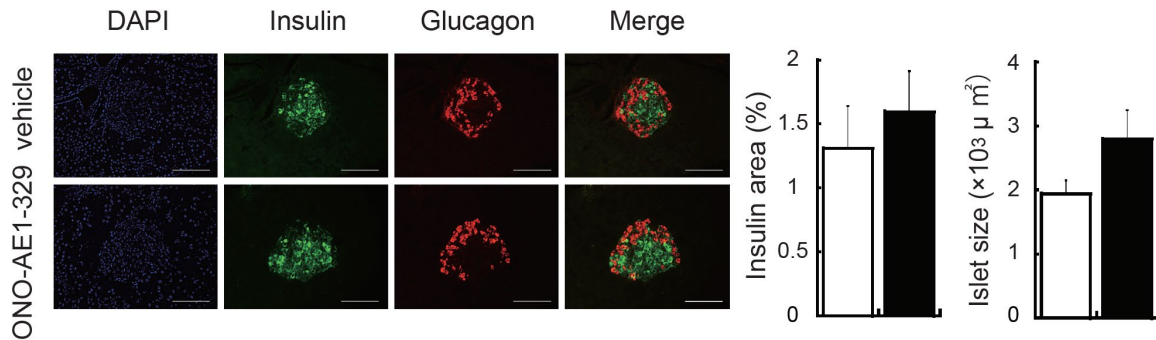

**EP4 activation did not affect pancreatic morphology.**

Islet morphology as analyzed by immunohistological examination. Sections of the pancreas from *db/db* mice were stained with anti-insulin antibody (green), anti-glucagon antibody (red), and DAPI (blue), and observed under a confocal fluorescence microscope. Scale bar, 100  $\mu m$ . The islet area (%) or  $\beta$ -cell area of insulin-positive cells (%) is shown in the graph (right panel). EP4 agonist (ONO-AE1-329) -treated group, black square and black bar; vehicle-treated group, white square and white bar;  $n = 5-6$  for each group. All values are the means  $\pm$  SEM. \*,  $P < 0.05$ ; #,  $P < 0.01$ . versus control.

**Figure S2**

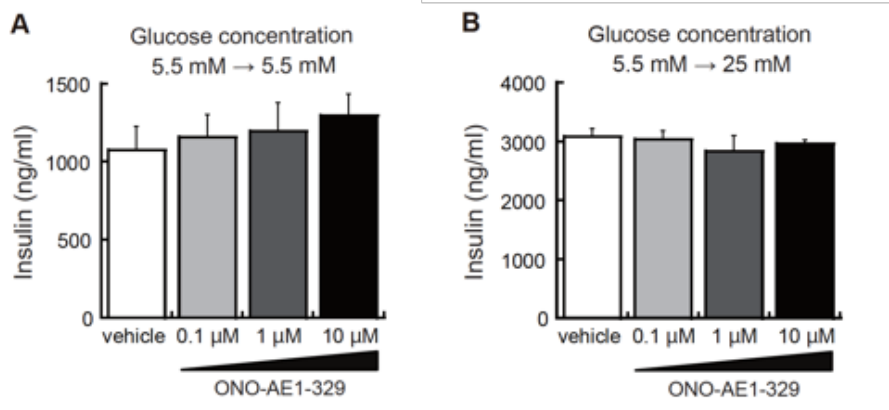

**Effect of EP4 activation on GSIS in MIN6 cells.**

MIN6 cells incubated with the EP4 agonist (ONO-AE1-329) did not respond in the insulin secretion assay; **A**, low-glucose medium (DMEM with 5.5 mM glucose) and **B**, high-glucose medium (DMEM with 25 mM glucose); n = 5–6 for each condition. All values are the means ± SEM.
